# Supplementary material
Source: Royal Society of Chemistry journal article supplement (doi:10.1039/d5cs01237f)
Supplement: d5cs01237f1.pdf [file d5cs01237f1.pdf]

## **Electronic Supplementary Information**

### **Covalent Organic Framework Membranes for Ion Separations and Ion-Driven Energy Conversion**

Qing Guo, Jiaming Yi, Huixia Lv, Zhuozhi Lai, Qi Sun\*

Zhejiang Provincial Key Laboratory of Advanced Chemical Engineering Manufacture Technology, college of Chemical and Biological Engineering, Zhejiang University, Hangzhou, 310027, China.

\*Correspondence to: [sunqichs@zju.edu.cn](mailto:sunqichs@zju.edu.cn) (QS)

**Table S1.** Summary of the separation performance of COF membranes in monovalent/multivalent cation separation.

| Membrane                                    | Feed concentration (mol L <sup>-1</sup> ) | Driving force | K <sup>+</sup> permeation rate (mol m <sup>-2</sup> h <sup>-1</sup> ) | K <sup>+</sup> /Mg <sup>+</sup> selectivity | Na <sup>+</sup> /Mg <sup>2+</sup> selectivity | Li <sup>+</sup> /Mg <sup>2+</sup> selectivity | K <sup>+</sup> /Li <sup>+</sup> selectivity | K <sup>+</sup> /Al <sup>3+</sup> selectivity |
|---------------------------------------------|-------------------------------------------|---------------|-----------------------------------------------------------------------|---------------------------------------------|-----------------------------------------------|-----------------------------------------------|---------------------------------------------|----------------------------------------------|
| COF-300 <sup>1</sup>                        | 0.1 M                                     | $\Delta C$    |                                                                       |                                             |                                               | 0.07                                          | 31.5                                        |                                              |
| COF-DhaTg <sup>2</sup>                      | 0.1 M                                     | $\Delta C$    |                                                                       | 590                                         | 506                                           | 230                                           |                                             |                                              |
| COF-TpTg/SPPSU-Cl <sup>3</sup>              | 0.05 M                                    | $\Delta E$    | 1.8                                                                   | 20.27                                       | 10.57                                         | 5.89                                          |                                             |                                              |
| COFTpPa-SO <sub>3</sub> Na/PAN <sup>4</sup> | 0.1 M                                     | $\Delta C$    | 0.5                                                                   | 400                                         | 480                                           | 192                                           |                                             |                                              |
| COF-B18C6Tapa/PAN <sup>5</sup>              | 0.05 M                                    | $\Delta E$    | 0.589                                                                 | 40                                          | 16                                            | 12                                            |                                             |                                              |
| COF-TfbDab-Azo <sup>6</sup>                 | 0.2 M                                     | $\Delta C$    | 0.74                                                                  |                                             |                                               |                                               |                                             | 6000                                         |

$\Delta C$ : dialysis conditions

$\Delta E$ : electro-driven conditions

**Table S2.** Summary of the separation performance of COF membranes in Li<sup>+</sup>/Mg<sup>2+</sup> separation.

| Membrane                                              | Feed concentration (mol L <sup>-1</sup> )                    | Driving force | Li <sup>+</sup> permeation rate (mol m <sup>-2</sup> h <sup>-1</sup> ) | Li <sup>+</sup> /Mg <sup>2+</sup> selectivity | Na <sup>+</sup> /Mg <sup>2+</sup> selectivity | K <sup>+</sup> /Mg <sup>2+</sup> selectivity |
|-------------------------------------------------------|--------------------------------------------------------------|---------------|------------------------------------------------------------------------|-----------------------------------------------|-----------------------------------------------|----------------------------------------------|
| COF-TpEb <sup>7</sup>                                 | 0.2 M                                                        | ΔC            | 0.13                                                                   | 48.0                                          | 99.8                                          | 130.4                                        |
| COF-Eb <sub>1</sub> Bd <sub>1</sub> /PAN <sup>8</sup> | 0.5 M                                                        | ΔC            |                                                                        | 353                                           | 360                                           | 35                                           |
| COF-TamDta-CH <sub>0.6</sub> <sup>9</sup>             | 0.1 M                                                        | ΔC            | 0.2                                                                    | 203                                           | 425                                           | 625                                          |
| COF-TpTg-PA <sup>10</sup>                             | 0.5 g L <sup>-1</sup> LiCl<br>30:1 (MgCl <sub>2</sub> :LiCl) | ΔP            | 1.0                                                                    | 21.3                                          |                                               |                                              |
| COF-TpMpd-PA <sup>11</sup>                            | 2000 ppm<br>20:1 (MgCl <sub>2</sub> :LiCl)                   | ΔP            | 0.08                                                                   | 73.0                                          |                                               |                                              |
| COF-TpMpd-PA/PES <sup>12</sup>                        | 2 g L <sup>-1</sup><br>20:1 (MgCl <sub>2</sub> :LiCl)        | ΔP            |                                                                        | 40.6                                          |                                               |                                              |
| COF-TpPa-SO <sub>3</sub> H-PA <sup>13</sup>           | 2 g L <sup>-1</sup>                                          | ΔP            |                                                                        | 120                                           |                                               |                                              |
| COF-TpEb/PEI <sup>14</sup>                            | 1000 ppm                                                     | ΔP            | 0.39                                                                   | 30.7                                          |                                               |                                              |
| COF-Qa-PA-2 <sup>15</sup>                             | 2000 ppm                                                     | ΔP            |                                                                        | 82.6                                          |                                               |                                              |
| COF-TfbTg-PA-3 <sup>16</sup>                          | 1000 ppm                                                     | ΔP            | 0.3                                                                    | 61.8                                          |                                               |                                              |
| COF-TpPa-SO <sub>3</sub> H <sup>17</sup>              | 0.1 M                                                        | ΔC            | 0.0025                                                                 | 1000                                          |                                               |                                              |
| COF-TpTat-P <sup>18</sup>                             | 0.1 M                                                        | ΔC            | 0.224                                                                  | 474                                           |                                               |                                              |
| ZIF-8/COF-TpPa-SO <sub>3</sub> H/nylon <sup>19</sup>  | 0.5 M                                                        | ΔC            | 23.2                                                                   | 116                                           |                                               |                                              |
| COF-TpPa-SO <sub>3</sub> H-PDDA <sup>20</sup>         | 2000 ppm<br>50:1 (MgCl <sub>2</sub> :LiCl)                   | ΔP            | 0.013                                                                  | 61.6                                          |                                               |                                              |
| COF-TpDy <sup>21</sup>                                | 0.1 M                                                        | ΔC            | 0.1                                                                    | 217                                           | 680                                           | 765                                          |
| COF-EO <sub>4</sub> /PAN <sup>22</sup>                | 0.1 M                                                        | ΔC            | 0.23                                                                   | 64                                            |                                               |                                              |

|                                        |                                             |            |      |      |  |  |
|----------------------------------------|---------------------------------------------|------------|------|------|--|--|
| COF-EO <sub>3</sub> /PAN <sup>23</sup> | 0.1 M                                       | $\Delta E$ | 0.2  | 1352 |  |  |
| COF-BtzTp <sup>24</sup>                | 0.1 M                                       | $\Delta C$ | 0.16 | 210  |  |  |
| COF-EO <sub>2</sub> <sup>25</sup>      | 2000 ppm<br>150:1 (MgCl <sub>2</sub> :LiCl) | $\Delta P$ | 0.03 | 30.2 |  |  |

$\Delta C$ : dialysis conditions

$\Delta E$ : electro-driven conditions

$\Delta P$ : pressure-driven conditions

**Table S3** Summary of the separation performance of COF membranes in lithium recovery from spent batteries.

| <b>Membrane</b>               | <b>Feed concentration<br/>(mol L<sup>-1</sup>)</b> | <b>Driving force</b> | <b>Li<sup>+</sup> permeation rate<br/>(mol m<sup>-2</sup> h<sup>-1</sup>)</b> | <b>Li<sup>+</sup>/Cu<sup>2+</sup><br/>selectivity</b> | <b>K<sup>+</sup>/Al<sup>3+</sup><br/>selectivity</b> | <b>Li<sup>+</sup>/Ni<sup>2+</sup><br/>selectivity</b> | <b>Li<sup>+</sup>/Co<sup>2+</sup><br/>selectivity</b> | <b>Li<sup>+</sup>/Mn<sup>2+</sup><br/>selectivity</b> |
|-------------------------------|----------------------------------------------------|----------------------|-------------------------------------------------------------------------------|-------------------------------------------------------|------------------------------------------------------|-------------------------------------------------------|-------------------------------------------------------|-------------------------------------------------------|
| COF-TfpmBd-COOH <sup>26</sup> | 0.1 M                                              | $\Delta C$           | 0.5                                                                           | 490                                                   |                                                      |                                                       |                                                       |                                                       |
| COF-TfpmPa <sup>27</sup>      | 0.1 M                                              | $\Delta C$           |                                                                               |                                                       | 823.5                                                |                                                       |                                                       |                                                       |
| COF-TpPy <sup>28</sup>        | 0.1 M                                              | $\Delta C$           | 0.13                                                                          |                                                       |                                                      | 107.7                                                 | 106.8                                                 | 67                                                    |
| COF-DmaTg <sup>29</sup>       | 0.1 M                                              | $\Delta C$           | 0.059                                                                         |                                                       |                                                      | 1491                                                  | 996                                                   | 243                                                   |

$\Delta C$ : dialysis conditions

**Table S4.** Summary of the separation performance of COF membranes in monovalent cations separation.

| Membrane                                     | Feed concentration (mol L <sup>-1</sup> ) | Driving force | Li <sup>+</sup> permeation rate (mol m <sup>-2</sup> h <sup>-1</sup> ) | Na <sup>+</sup> permeation rate (mol m <sup>-2</sup> h <sup>-1</sup> ) | K <sup>+</sup> permeation rate (mol m <sup>-2</sup> h <sup>-1</sup> ) | Na <sup>+</sup> /K <sup>+</sup> selectivity | K <sup>+</sup> /Li <sup>+</sup> selectivity | Na <sup>+</sup> /Li <sup>+</sup> selectivity |
|----------------------------------------------|-------------------------------------------|---------------|------------------------------------------------------------------------|------------------------------------------------------------------------|-----------------------------------------------------------------------|---------------------------------------------|---------------------------------------------|----------------------------------------------|
| COF-Cys-60% <sup>30</sup>                    | 0.1 M                                     | $\Delta C$    |                                                                        | 0.0613                                                                 | 0.0245                                                                | 2.5                                         |                                             |                                              |
| COF-TpPa-SO <sub>3</sub> H <sup>31</sup>     | 0.1 M                                     | $\Delta C$    |                                                                        |                                                                        | 0.33                                                                  |                                             | 16.4                                        |                                              |
| COF-TpHz-D <sup>32</sup>                     | 0.1 M                                     | $\Delta C$    | 0.14                                                                   |                                                                        |                                                                       | 5.4                                         | 0.026                                       | 0.14                                         |
| COF-TpPa-COOH-3 <sup>33</sup>                | 0.1 M                                     | $\Delta C$    |                                                                        |                                                                        | 0.269                                                                 |                                             | 18.7                                        |                                              |
| COF-TpPa-SO <sub>3</sub> H-(r) <sup>34</sup> | 0.1 M                                     | $\Delta C$    |                                                                        | 0.15                                                                   | 0.3                                                                   |                                             | $\infty$                                    | $\infty$                                     |
| COF-DhHz-15C <sup>35</sup>                   | 1.0 M                                     | $\Delta C$    |                                                                        | 0.00933                                                                |                                                                       | 58.31                                       |                                             |                                              |

$\Delta C$ : dialysis conditions

**Table S5.** Summary of the separation performance of COF membranes in proton and metal cation separation.

| Membrane                                                                      | Feed concentration (mol L <sup>-1</sup> )      | Driving force | H <sup>+</sup> permeation rate (mol m <sup>-2</sup> h <sup>-1</sup> ) | H <sup>+</sup> /Fe <sup>2+</sup> selectivity | H <sup>+</sup> /Li <sup>+</sup> selectivity | H <sup>+</sup> /Na <sup>+</sup> selectivity | H <sup>+</sup> /K <sup>+</sup> selectivity | H <sup>+</sup> /Mg <sup>2+</sup> selectivity | H <sup>+</sup> /Ca <sup>2+</sup> selectivity | H <sup>+</sup> /Al <sup>3+</sup> selectivity |
|-------------------------------------------------------------------------------|------------------------------------------------|---------------|-----------------------------------------------------------------------|----------------------------------------------|---------------------------------------------|---------------------------------------------|--------------------------------------------|----------------------------------------------|----------------------------------------------|----------------------------------------------|
| COF-TfbTg/HPAN <sup>36</sup>                                                  | 1 M H <sup>+</sup> + 0.26 M Fe <sup>2+</sup>   | ΔC            |                                                                       | 1266                                         |                                             |                                             |                                            |                                              |                                              |                                              |
| COF-DhaTg/HPAN <sup>37</sup>                                                  | 1 M H <sup>+</sup> + 0.26 M Fe <sup>2+</sup>   | ΔC            |                                                                       | 4589                                         |                                             |                                             |                                            |                                              |                                              |                                              |
| COF-DmaTg/HPAN <sup>38</sup>                                                  | 1 M H <sup>+</sup> + 0.2 M Fe <sup>2+</sup>    | ΔC            |                                                                       | 1248.9                                       |                                             |                                             |                                            |                                              |                                              |                                              |
| COF-TamTp <sup>39</sup>                                                       | 0.5 M H <sup>+</sup> + 0.12 M Fe <sup>2+</sup> | ΔC            |                                                                       | 5617                                         |                                             | 354                                         |                                            |                                              | 1913                                         | 8247                                         |
| COF-Eb <sub>1</sub> Bd <sub>1</sub> /HPAN <sup>40</sup>                       | 0.5 M H <sup>+</sup> + 0.13 M Fe <sup>2+</sup> | ΔC            |                                                                       | 5186.9                                       |                                             |                                             |                                            |                                              |                                              |                                              |
| COF-TpTapa <sup>41</sup>                                                      | 0.1 M                                          | ΔC            |                                                                       | 1499                                         | 145                                         | 143                                         | 136                                        | 608                                          |                                              |                                              |
| COF-DmaTg/PES <sup>42</sup>                                                   | 0.1 M                                          | ΔC            |                                                                       |                                              | 334                                         | 269                                         | 253                                        |                                              | 388                                          | 1173                                         |
| COF-TpTg <sup>43</sup>                                                        | 0.25 M                                         | ΔC            | 0.9                                                                   | 3545                                         | 346                                         | 259                                         | 253                                        | 1116                                         | 886                                          | 4334                                         |
| COF-Eb <sub>0.33</sub> (Pa-SO <sub>3</sub> H) <sub>3</sub> /PAN <sup>44</sup> | 0.5 M                                          | ΔC            |                                                                       |                                              |                                             | 5.7                                         | 3.8                                        | 18.6                                         | 12.3                                         |                                              |
| COF-TpPa-SO <sub>3</sub> H <sup>45</sup>                                      | 1 M                                            | ΔC            |                                                                       |                                              | ∞                                           | ∞                                           | ∞                                          |                                              |                                              |                                              |

ΔC: dialysis conditions

**Table S6.** Summary of the separation performance of COF membranes in Cl<sup>-</sup>/SO<sub>4</sub><sup>2-</sup> separation.

| Membrane                                       | Feed concentration (mol L <sup>-1</sup> ) | Driving force | Cl <sup>-</sup> permeation rate (mol m <sup>-2</sup> h <sup>-1</sup> ) | Cl <sup>-</sup> /SO <sub>4</sub> <sup>2-</sup> selectivity |
|------------------------------------------------|-------------------------------------------|---------------|------------------------------------------------------------------------|------------------------------------------------------------|
| COF-TpPa-SO <sub>3</sub> H <sup>46</sup>       | 0.35 mM                                   | ΔC            | 0.009                                                                  | 3.6                                                        |
| COF-DmaTb-PA <sup>47</sup>                     |                                           | ΔP            |                                                                        | 84                                                         |
| COF-TpPa-SO <sub>3</sub> H/aAEM3 <sup>48</sup> | 0.05 M                                    | ΔC            |                                                                        | 18.92                                                      |
| COF-TpPa-SO <sub>3</sub> Na-PA <sup>49</sup>   | 500 ppm                                   | ΔP            |                                                                        | 310                                                        |
| COF-TpPa-PA <sup>50</sup>                      | 200 ppm                                   | ΔP            |                                                                        | 137                                                        |
| COF-TpaPip-0.0625 <sup>51</sup>                | 2 g L <sup>-1</sup>                       | ΔP            |                                                                        | 96.5                                                       |
| COF-DhaTb-PA-4 <sup>52</sup>                   | 1000 ppm                                  | ΔP            |                                                                        | 105.1                                                      |
| COF-DtaTb-170 <sup>53</sup>                    | 0.1 M                                     | ΔC            |                                                                        | 64                                                         |

ΔC: dialysis conditions

ΔP: pressure-driven conditions

**Table S7.** Summary of the separation performance of COF membranes for radioactive and rare metal ion separation.

| <b>Membrane</b>                   | <b>Feed concentration<br/>(mol L<sup>-1</sup>)</b> | <b>Driving force</b> | <b>Cr<sup>+</sup> permeation rate<br/>(mol m<sup>-2</sup> h<sup>-1</sup>)</b> | <b>Cr<sup>+</sup>/La<sup>3+</sup><br/>selectivity</b> | <b>Cr<sup>+</sup>/Sr<sup>2+</sup><br/>selectivity</b> | <b>Sr<sup>2+</sup>/La<sup>3+</sup><br/>selectivity</b> | <b>U<sup>6+</sup>/Th<sup>4+</sup><br/>selectivity</b> | <b>Sr<sup>2+</sup>/Y<sup>3+</sup><br/>selectivity</b> |
|-----------------------------------|----------------------------------------------------|----------------------|-------------------------------------------------------------------------------|-------------------------------------------------------|-------------------------------------------------------|--------------------------------------------------------|-------------------------------------------------------|-------------------------------------------------------|
| COF-HbabTat <sup>54</sup>         | 0.1 M                                              | ΔC                   | 0.33                                                                          | 69.8                                                  | 13.3                                                  | 2.1                                                    |                                                       |                                                       |
| COF-TfbDbd-(S) <sup>55</sup>      | 20 ppm                                             | ΔC                   |                                                                               |                                                       |                                                       |                                                        | 9.8                                                   |                                                       |
| COF-TbDha- <i>o</i> <sup>56</sup> | 20 ppm                                             | ΔC                   |                                                                               |                                                       |                                                       |                                                        |                                                       | 49                                                    |

ΔC: dialysis conditions

**Table S8.** Summary of the energy conversion performance of COF membranes integrated into RED devices.

| Materials                                                     | System (NaCl Aqueous)                             | Power density (W m <sup>-2</sup> ) | Energy conversion efficiency (%) | External stimuli        | Testing area (m <sup>2</sup> ) |
|---------------------------------------------------------------|---------------------------------------------------|------------------------------------|----------------------------------|-------------------------|--------------------------------|
| COF-TpPa-SO <sub>3</sub> H <sup>57</sup>                      | 0.5 M    0.01 M                                   | 5.9                                | 25.9                             | --                      | 3×10 <sup>-8</sup>             |
| COF-TamDp-SO <sub>3</sub> H <sup>58</sup>                     | 0.5 M    0.01 M                                   | 21.2                               | 45.3                             | --                      | 3×10 <sup>-8</sup>             |
| COF-TpV-CF <sub>3</sub> SO <sub>3</sub> <sup>59</sup>         | 0.5 M    0.01 M                                   | 55                                 | --                               | --                      | 1.2×10 <sup>-12</sup>          |
| COF-TpDa-PVA-4.1% <sup>60</sup>                               | 0.5 M    0.01 M (KCl)                             | 12.5                               | --                               | --                      | 3.14×10 <sup>-8</sup>          |
| COF-TpTg/PAN <sup>61</sup>                                    | 0.5 M    0.01 M (H <sub>2</sub> SO <sub>4</sub> ) | 97.1                               | --                               | --                      | 7.85×10 <sup>-9</sup>          |
| COF-TfpPa-SO <sub>3</sub> H/SANF <sup>62</sup>                | 0.5 M    0.01 M                                   | 8.7                                | --                               | --                      | 3×10 <sup>-8</sup>             |
| Ca-COF <sup>63</sup>                                          | 0.5 M    0.01 M                                   | 180.5                              | 37.1                             | --                      | 1×10 <sup>-10</sup>            |
| COF-ZnTPP <sup>64</sup>                                       | 0.5 M    0.01 M                                   | 135.8                              | --                               | --                      | 3.14×10 <sup>-12</sup>         |
| COF-ZnTPPTpa <sup>65</sup>                                    | 0.001 M (LiCl)    1 M (MeOH)                      | 84.5                               | --                               | --                      | --                             |
| COF-ZnTPPVg <sup>66</sup>                                     | 0.5 M    0.01 M                                   | 102                                | --                               | --                      | 3.14×10 <sup>-12</sup>         |
| COF-CuTPP <sup>67</sup>                                       | 0.5 M    0.01 M                                   | 22.08                              | 5.63                             |                         | 2.5×10 <sup>-7</sup>           |
| COF-DhaDt <sup>68</sup>                                       | 0.5 M    0.01 M                                   | 51.4 (pH=3.5)                      | --                               | --                      | --                             |
| COF-TfppEb <sup>69</sup>                                      | 0.5 M    0.01 M                                   | 7,174                              | 11.52                            |                         | 7.9×10 <sup>-15</sup>          |
| COF-Bta <sub>1</sub> Bth <sub>1</sub> /PAN <sup>70</sup>      | 0.01 M    0.5 M    0.01 M                         | 51.9                               | 33                               | --                      | 7.85×10 <sup>-9</sup>          |
| COF-Bta/PAN <sup>71</sup>                                     | 0.01 M    0.5 M    0.01 M                         | 60 (247 <sup>[a]</sup> )           |                                  | ΔT=30 K                 | 7.85×10 <sup>-9</sup>          |
| COF-Eb <sub>1</sub> Bd <sub>2</sub> /PAN <sup>72</sup>        | 0.5 M    0.01 M                                   | 113 (215 <sup>[a]</sup> )          | --                               | ΔT=40 K                 | 7.85×10 <sup>-9</sup>          |
| COF-TpPa-(SO <sub>3</sub> Na) <sub>1</sub> /PAN <sup>73</sup> | 0.5 M    0.01 M                                   | 97 (231 <sup>[a]</sup> )           | --                               | ΔT=60 K                 | 7.85×10 <sup>-9</sup>          |
| COF-TpEb@TpPa-SO <sub>3</sub> Na-300 <sup>74</sup>            | 0.5 M    0.01 M                                   | 19.2                               | 26.9                             | --                      | 3×10 <sup>-8</sup>             |
| COF-SO <sub>3</sub> H-24 and COF-Qa-24 <sup>75</sup>          | 0.5 M    0.01 M                                   | 43.2                               | --                               | --                      | 3×10 <sup>-8</sup>             |
| COF-Dma <sub>3</sub> Dha <sub>1</sub> -Qa <sup>76</sup>       | 0.5 M    0.01 M                                   | 53.2 (69.6 <sup>[a]</sup> )        | --                               | 200 mW cm <sup>-2</sup> | 8×10 <sup>-9</sup>             |
| COF-PtaDha-SO <sub>3</sub> K <sup>77</sup>                    | 0.5 M    0.01 M                                   | 10.8 (18.0 <sup>[a]</sup> )        | 21.2                             | 100 mW cm <sup>-2</sup> | 4×10 <sup>-8</sup>             |
| COF-COOH-6h and COF-Qa-6h <sup>78</sup>                       | 0.01 M    0.5 M    0.01 M                         | 104 (195 <sup>[a]</sup> )          | --                               | ΔT=35 K                 | 7.85×10 <sup>-9</sup>          |

|                                                                                                           |                                                                                                 |                            |             |                                                 |                        |
|-----------------------------------------------------------------------------------------------------------|-------------------------------------------------------------------------------------------------|----------------------------|-------------|-------------------------------------------------|------------------------|
| COF-TpPa-Tmc/PES <sup>79</sup>                                                                            | 2 M    0.04 M (H <sub>2</sub> SO <sub>4</sub> )                                                 | 135.65                     | --          | --                                              | 3×10 <sup>-8</sup>     |
| HB <sub>67.7</sub> @COF/PAN and JG <sub>80.1</sub> @COF/PAN <sup>80</sup>                                 | 0.01 M    0.5 M    0.01 M                                                                       | 51.4                       | 36.8        | --                                              | 7.85×10 <sup>-9</sup>  |
| HB <sub>0.84</sub> /JG <sub>0.55</sub> @COF and JG <sub>0.86</sub> /HB <sub>0.54</sub> @COF <sup>81</sup> | 0.5 M    0.01 M                                                                                 | 63.7                       | 23          | --                                              | --                     |
| HB <sub>5.7</sub> @COF-TamDha/PAN <sup>82</sup>                                                           | 0.5 M    0.01 M                                                                                 | 75.4 (129 <sup>[a]</sup> ) | --          | 120 mW cm <sup>-2</sup>                         | 1.5×10 <sup>-10</sup>  |
| COF-TpDa/ANF <sup>83</sup>                                                                                | 0.5 M (H <sub>2</sub> SO <sub>4</sub> )+1 mM (NaCl)    0.01 M (H <sub>2</sub> SO <sub>4</sub> ) | 550.5                      | --          | --                                              | 5.03×10 <sup>-5</sup>  |
| COF-TftTmt <sup>84</sup>                                                                                  | 0.5 M    0.01 M                                                                                 | 14.1 (pH=14)               | --          | --                                              | 7.85×10 <sup>-9</sup>  |
| COF-TbBdt <sup>85</sup>                                                                                   | 0.5 M    0.01 M                                                                                 | 96 (155 <sup>[a]</sup> )   | 27.1 (46.1) | 0.5 M    0.05 M Na <sub>3</sub> PO <sub>4</sub> | 7.85×10 <sup>-9</sup>  |
| COF-TamDha <sup>86</sup>                                                                                  | 0.5 M    0.01 M                                                                                 | 217.7                      | --          | --                                              | 2.25×10 <sup>-10</sup> |
| COF-TafDb <sup>87</sup>                                                                                   | 0.5 M    0.1 mM                                                                                 | 0.17 mW m <sup>-2</sup>    | --          | --                                              | --                     |
| COF-300 <sup>88</sup>                                                                                     | 0.5 M    0.01 M (KCl)                                                                           | 5.31                       | 10.38       | --                                              | 2×10 <sup>-8</sup>     |
| COF-LZU1/CNT-CNF <sup>89</sup>                                                                            | 0.5 M    0.01 M                                                                                 | 3.91                       | --          | --                                              | 3×10 <sup>-8</sup>     |
| COF-TpPa-COOH/HPAN <sup>90</sup>                                                                          | 0.5 M    0.01 M (KCl)                                                                           | 4.90                       | 32.6        | --                                              | 3×10 <sup>-8</sup>     |
| COF-TpPa/PAN <sup>91</sup>                                                                                | 3 M    3 M (KCl)                                                                                | 20.22                      | --          | PO <sub>4</sub> <sup>3-</sup> , ΔT=50 K         | 7.85×10 <sup>-9</sup>  |
| COF-DhHz <sup>92</sup>                                                                                    | 2.5 M    0.05 M                                                                                 | 16.9                       | 36          | --                                              | 3×10 <sup>-10</sup>    |
| DG <sub>6.2</sub> @COF/PAN <sup>93</sup>                                                                  | 0.5 M (NaCl)    5 mM (CaCl <sub>2</sub> )                                                       | 42.2                       | 48          | --                                              | 1.5×10 <sup>-10</sup>  |
| COF-TfbTb/AAO <sup>94</sup>                                                                               | 5 M    0.01 M                                                                                   | 17.95                      | 4.5         | --                                              | 3×10 <sup>-8</sup>     |
| COF-TpTapa/ANM <sup>95</sup>                                                                              | 5 M    0.01 M                                                                                   | 27.8 (pH=6.2)              | 9.58        | --                                              | 3×10 <sup>-8</sup>     |

[a] The values in parentheses represent the output power density when an additional power difference is present.

## References

- 1 B. Niu, W. Xin, Y. Qian, X.-Y. Kong, L. Jiang and L. Wen, *Chem. Commun.*, 2022, **58**, 5403–5406.
- 2 X. Liu, W. Lin, K. B. Al Mohawes and N. M. Khashab, *Small Struct.*, 2024, **6**, 2400496.
- 3 X. Zhang, B. Wu, X. Zhao, L. Ge, J. Pan and C. Gao, *Adv. Funct. Mater.*, 2025, **35**, 2508966.
- 4 X. Chu, J. Miao, Q. Ge, F. Sheng, R. Xia, B. Wu and J. Qian, *J. Membr. Sci.*, 2025, **722**, 123860.
- 5 Y. Du, D. Lei, X. Hao, Z. Liu and X. Du, *Sep. Purif. Technol.*, 2025, **376**, 133979.
- 6 C. Yin, Z. Zhang, Z. Si, X. Shi and Y. Wang, *Chem. Mater.*, 2022, **34**, 9212–9220.
- 7 R. Wang, L. Ding, J. Xue, H. Wu, C. Cai, Z. Qiao, J. Caro and H. Wang, *Small Methods*, 2024, **9**, 2401111.
- 8 L. Hou, W. Xian, S. Bing, Y. Song, Q. Sun, L. Zhang and S. Ma, *Adv. Funct. Mater.*, 2021, **31**, 2009970.
- 9 W. Meng, S. Chen, Z. Guo, F. Gao, J. Wang, J. Lu, Y. Hou, Q. He, X. Zhan, M. Qiu and Q. Zhang, *Nat. Water*, 2025, **3**, 191–200.
- 10 Z. Si, Z. Zhang, C. Yin, T. Ju, M. Wei, J. Huang and Y. Wang, *J. Membr. Sci.*, 2023, **680**, 121759.
- 11 Y.-X. Fang, Y.-F. Lin, Z.-L. Xu, D. Pandaya and S.-J. Xu, *Desalination*, 2024, **588**, 117977.
- 12 Y.-X. Fang, Z.-L. Xu and S.-J. Xu, *Sep. Purif. Technol.*, 2025, **355**, 129747.
- 13 S. Zhao, L. Dai, Z. Mai, B. Li, P. Zhang, M. Zhang, A. Matsuoka, K. Guan, R. Takagi and H. Matsuyama, *Adv. Sci.*, 2025, **12**, 2500255.
- 14 B. Hu, H. Deng, Y. Zheng, Z. Zhang, T. Wu, Z. Liu, B. Jia, H. Lin, R. Zhang and Z. Jiang, *J. Membr. Sci.*, 2025, **715**, 123489.
- 15 Z. Liu, S. Zhang, J. Yuan, Z. Zhang, B. Shi, T. Wu, B. Hu, H. Wang, R. Zhang and Z. Jiang, *Desalination*, 2025, **600**, 118523.
- 16 S. Zhang, T. Gu, Z. Li, J. Yuan, C. Yang, Z. Liu, Y. Zheng, X. Meng, X. Yue, Q. Liu, H. Wang, R. Zhang and Z. Jiang, *J. Membr. Sci.*, 2025, **725**, 124046.
- 17 G. Wang, L. Shao and S. Zhang, *Adv. Mater.*, 2025, **37**, 2414898.
- 18 W. Meng, S. Chen, M. Wu, F. Gao, Y. Hou, X. Zhan, W. Hu, L. Liang and Q. Zhang, *Angew. Chem. Int. Ed.*, 2025, **64**, e202422423.
- 19 Y. Ma, L. Liu, R. Yu, M. Ma, N. Gao, L. Sun, N. Zhang and G. Zhu, *Small*, 2025, **21**, 2409570.
- 20 S. Xu, H. Lin, G. Li, Q. Han, J. Wang and F. Liu, *Adv. Sci.*, 2024, **11**, 2405539.
- 21 F. Sheng, B. Wu, X. Li, T. Xu, M. A. Shehzad, X. Wang, L. Ge, H. Wang and T. Xu, *Adv. Mater.*, 2021, **33**, 2104404.
- 22 S. Bing, W. Xian, S. Chen, Y. Song, L. Hou, X. Liu, S. Ma, Q. Sun and L. Zhang, *Matter*, 2021, **4**, 2027–2038.
- 23 Q.-W. Meng, X. Zhu, W. Xian, S. Wang, Z. Zhang, L. Zheng, Z. Dai, H. Yin, S. Ma and Q. Sun, *Proc. Natl. Acad. Sci. U. S. A.*, 2024, **121**, e2316716121.
- 24 Q.-W. Meng, J. Li, Z. Xing, W. Xian, Z. Lai, Z. Dai, S. Wang, L. Zhang, H. Yin, S. Ma and Q. Sun, *ACS Nano*, 2025, **19**, 12080–12089.
- 25 L. Ren, J. Chen, J. Han, J. Liang and H. Wu, *Chem. Eng. J.*, 2023, **462**, 142112.
- 26 X. Shi, Z. Zhang, S. Fang, J. Wang, Y. Zhang and Y. Wang, *Nano Lett.*, 2021, **21**, 8355–8362.
- 27 X. Shi, Z. Zhang, M. Wei, X. Wang, J. Wang, Y. Zhang and Y. Wang, *Macromolecules*, 2022, **55**, 3259–3266.
- 28 W. Yu, Y. Qian, H. Ji, Z. Zhu, T. Wu, T. Qian, C. Yan and J. Lu, *Inorg. Chem. Front.*, 2025, **12**, 3853–3863.

- 29 C. Liu, L. Li, L. Li, X. He and H. Matsuyama, *J. Membr. Sci.*, 2025, **734**, 124433.
- 30 L. Cao, I.-C. Chen, Z. Li, X. Liu, M. Mubashir, R. A. Nuaimi and Z. Lai, *Nat. Commun.*, 2022, **13**, 7894.
- 31 H. Wang, Y. Zhai, Y. Li, Y. Cao, B. Shi, R. Li, Z. Zhu, H. Jiang, Z. Guo, M. Wang, L. Chen, Y. Liu, K.-G. Zhou, F. Pan and Z. Jiang, *Nat. Commun.*, 2022, **13**, 7123.
- 32 Q. Sun, Z. Song, J. Du, A. Yao, L. Liu, W. He, S. U. Hassan, J. Guan and J. Liu, *ACS Nano*, 2024, **18**, 27065–27076.
- 33 Z. Wu, M. Wang, X. Liu, J. Wu, M. Liu, Y. Liu, Y. Cao, X. Wu, B. Wang and D. Li, *Adv. Funct. Mater.*, 2025, **35**, 2416228.
- 34 S. Bao, Z. Ma, L. Yu, Q. Li, J. Xia, S. Song, K. Sui, Y. Zhao, X. Liu and J. Gao, *Nat. Commun.*, 2025, **16**, 3896.
- 35 J. Wang, J. Zhang, P. Jin, H. Wen, Z. Dai, H. Tan, S. Yuan, J. Yang and M. Elimelech, *Nat. Commun.*, 2025, **16**, 7346.
- 36 C. Yang, L. Hou, Z. Yao, J. Zhao, L. 'an Hou and L. Zhang, *J. Membr. Sci.*, 2021, **640**, 119800.
- 37 C. Yang, L. Hou, J. Zhao, Z. Yao, G. Li, L. Zhang and L. Hou, *Chem. Eng. J.*, 2022, **428**, 131124.
- 38 C. Yang, S. Ding, L. Hou, L. Hou and L. Zhang, *Sep. Purif. Technol.*, 2023, **313**, 123463.
- 39 L. Hou, C. Yang, T. Xu, J. Pan and C. Li, *J. Membr. Sci.*, 2025, **731**, 124242.
- 40 C. Yang, X. Fu, L. Hou and L. Hou, *J. Membr. Sci.*, 2025, **717**, 123606.
- 41 F. Sheng, Y. Xia, Z. Zhao, T. Xu, L. Ge, X. Li and T. Xu, *Chem. Eng. J.*, 2023, **462**, 142304.
- 42 X. Liu, W. Lin, K. B. Al Mohawes and N. M. Khashab, *Angew. Chem. Int. Ed.*, 2024, **64**, e202419034.
- 43 Q.-W. Meng, S. Wu, M. Liu, Q. Guo, W. Xian, X. Zuo, S. Wang, H. Yin, S. Ma and Q. Sun, *Sci. Adv.*, 2023, **9**, eadh0207.
- 44 D. Wu, Z. Xing, Q. Guo, Z. Lai, J. Yi, Q. Meng, S. Wang, Z. Dai, S. Ma and Q. Sun, *Angew. Chem. Int. Ed.*, 2025, **64**, e202503945.
- 45 Q. Li, H. Gao, Y. Zhao, B. Zhou, L. Yu, Q. Huang, L. Jiang and J. Gao, *Angew. Chem. Int. Ed.*, 2024, **63**, e202402094.
- 46 X. You, L. Cao, Y. Liu, H. Wu, R. Li, Q. Xiao, J. Yuan, R. Zhang, C. Fan, X. Wang, P. Yang, X. Yang, Y. Ma and Z. Jiang, *ACS Nano*, 2022, **16**, 11781–11791.
- 47 S. Han, Z. Mai, Z. Wang, X. Zhang, J. Zhu, J. Shen, J. Wang, Y. Wang and Y. Zhang, *ACS Appl. Mater. Interfaces*, 2022, **14**, 3427–3436.
- 48 Y. Wang, L. Ren, J. Wang, J. Zhao and Q.-B. Chen, *J. Membr. Sci.*, 2022, **659**, 120818.
- 49 S. Xu, H. Lin, G. Li, J. Wang, Q. Han and F. Liu, *Chem. Eng. J.*, 2022, **427**, 132009.
- 50 R. S. Khandge, T.-T. Nguyen, Z. Qiang, H.-K. Yu and X. Ma, *ACS Appl. Polym. Mater.*, 2024, **6**, 13877–13885.
- 51 R. Guo, Z. Zha, J. Wang, Z. Wang, M. D. Guiver and S. Zhao, *Small*, 2024, **20**, 2308904.
- 52 Y. Zhang, S. Tian, Q. Sha, Y. Wang, X. Zhang, X. Yan and N. Han, *J. Membr. Sci.*, 2025, **722**, 123908.
- 53 Q.-W. Meng, J. Li, Z. Lai, W. Xian, S. Wang, F. Chen, Z. Dai, L. Zhang, H. Yin, S. Ma and Q. Sun, *Sci. Adv.*, 2024, **10**, eado8658.
- 54 Q. Liu, M. Liu, Z. Zhang, C. Yin, J. Long, M. Wei and Y. Wang, *Nat. Commun.*, 2024, **15**, 9221.
- 55 Y. Zou, Y. Zhang, J. Zhang, P. He, Z. Fan, N. He, X. Li, Y. Li and L. Ma, *J. Am. Chem. Soc.*, 2025, **147**, 32580–32590.
- 56 C. Deng, J. Zhang, Y. Zou, Y. Zhang, N. He, J. Zhou, Y. Li, L. Zhao and L. Ma, *Sep. Purif. Technol.*, 2025, **360**, 131120.

- 57 S. Hou, W. Ji, J. Chen, Y. Teng, L. Wen and L. Jiang, *Angew. Chem. Int. Ed.*, 2021, **60**, 9925–9930.
- 58 T. Zhu, Y. Kong, B. Lyu, L. Cao, B. Shi, X. Wang, X. Pang, C. Fan, C. Yang, H. Wu and Z. Jiang, *Nat. Commun.*, 2023, **14**, 5926.
- 59 X. Liu, Z. Wang, Q. Zhang, D. Lei, X. Li, Z. Zhang and X. Feng, *Angew. Chem. Int. Ed.*, 2024, **63**, e202409349.
- 60 Y. Huang, P. Shen, Q. Ma, W.-Y. Li, N. Ma, X. Wang, B. Sun, F. Xia, Y. Jiang and M. Zhu, *Nano Energy*, 2025, **138**, 110898.
- 61 J. Yi, Z. Lai, Q. Guo, Z. Xing and Q. Sun, *Adv. Membr.*, 2025, **5**, 100130.
- 62 Z. Man, J. Safaei, Z. Zhang, Y. Wang, D. Zhou, P. Li, X. Zhang, L. Jiang and G. Wang, *J. Am. Chem. Soc.*, 2021, **143**, 16206–16216.
- 63 W. Jiang, J. Zhou, X. Zhong, M. Fang, J. Hao, D. Zhao, X. Wen, H. Wang, Y. Zhou, Y. Zhu and L. Jiang, *Nat. Sustain.*, 2025, **8**, 446–455.
- 64 J. Yang, B. Tu, G. Zhang, P. Liu, K. Hu, J. Wang, Z. Yan, Z. Huang, M. Fang, J. Hou, Q. Fang, X. Qiu, L. Li and Z. Tang, *Nat. Nanotechnol.*, 2022, **17**, 622–628.
- 65 M. Fang, Z. Yan, Y. Ying, C. Hu, X. Xi, G. Zhang, X. Zhang, X.-C. Chen, Z. Tang and L. Li, *Nano Lett.*, 2024, **24**, 4618–4624.
- 66 Z. Huang, M. Fang, B. Tu, J. Yang, Z. Yan, H. G. Alemayehu, Z. Tang and L. Li, *ACS Nano*, 2022, **16**, 17149–17156.
- 67 S. Xin, Y. Ying, H. Xie, M. Fang, X. Zhang, Y. Wang, J. Yang and L. Li, *Small Methods*, 2025, **9**, 2500613.
- 68 H. Yang, J. Han, S. Li, P. St. Petkov, Q. Xue, X. Feng and T. Zhang, *Nat. Commun.*, 2025, **16**, 2336.
- 69 J. Zong, W. Ma, Y. Jiang, F. Wu, X. He, P. Yu and L. Mao, *Innovation*, 2025, **4**, 100908.
- 70 C. Zhu, W. Xian, Y. Song, X. Zuo, Y. Wang, S. Ma and Q. Sun, *Adv. Funct. Mater.*, 2022, **32**, 2109210.
- 71 C. Zhu, X. Zuo, W. Xian, Q. Guo, Q.-W. Meng, S. Wang, S. Ma and Q. Sun, *ACS Energy Lett.*, 2022, **7**, 2937–2943.
- 72 W. Xian, X. Zuo, C. Zhu, Q. Guo, Q.-W. Meng, X. Zhu, S. Wang, S. Ma and Q. Sun, *Nat. Commun.*, 2022, **13**, 3386.
- 73 X. Zuo, C. Zhu, W. Xian, Q. Meng, Q. Guo, X. Zhu, S. Wang, Y. Wang, S. Ma and Q. Sun, *Angew. Chem. Int. Ed.*, 2022, **61**, e202116910.
- 74 L. Cao, I.-C. Chen, X. Liu, Z. Li, Z. Zhou and Z. Lai, *ACS Nano*, 2022, **16**, 18910–18920.
- 75 L. Cao, I.-C. Chen, C. Chen, D. B. Shinde, X. Liu, Z. Li, Z. Zhou, Y. Zhang, Y. Han and Z. Lai, *J. Am. Chem. Soc.*, 2022, **144**, 12400–12409.
- 76 W. Xian, C. Zhu, Z. Lai, X. Zuo, Q.-W. Meng, L. Zheng, S. Wang, Z. Dai, F. Chen, S. Ma and Q. Sun, *Small*, 2024, **20**, 2310791.
- 77 W. Xian, C. Zhu, Z. Lai, Q. Guo, D. Wu, Q.-W. Meng, S. Wang, S. Ma and Q. Sun, *Chem Bio Eng.*, 2024, **1**, 461–468.
- 78 Z. Lai, H. Su, W. Xian, Q. Guo, Q. Meng, D. Wu, S. Wang and Q. Sun, *Adv. Energy Mater.*, 2025, **15**, 2405045.
- 79 M. Jian, X. Ding, Q. Li, Y. Zhao, B. Wang, L. Yang, L. Jiang and J. Gao, *ACS Nano*, 2025, **19**, 16405–16414.
- 80 S. Chen, C. Zhu, W. Xian, X. Liu, X. Liu, Q. Zhang, S. Ma and Q. Sun, *J. Am. Chem. Soc.*, 2021, **143**, 9415–9422.
- 81 S. Chen, W. Meng, Z. Tong, P. Chen, F. Gao, Y. Hou, J. Lu, Q. He, H. Wang, X. Zhan and Q. Zhang, *Small*, 2024, **20**, 2404605.
- 82 Q. Guo, Z. Lai, X. Zuo, W. Xian, S. Wu, L. Zheng, Z. Dai, S. Wang and Q. Sun, *Nat. Commun.*, 2023, **14**, 6702.
- 83 W. Jiang, X. Ding, Z. Huang, X. Feng, M. Wang, X. Zhang, S. Ying, H. Wang, J. Gao, Y. Zhu and L. Jiang, *J. Am. Chem. Soc.*, 2025, **147**, 12604–12613.
- 84 K. Wang, H. Yang, Z. Liao, S. Li, M. Hamsch, G. Fu, S. C. B. Mannsfeld, Q. Sun and T. Zhang, *J. Am. Chem. Soc.*, 2023, **145**, 5203–5210.
- 85 Z. Lai, Y. Ai, W. Xian, Q. Guo, Q. Meng, S. Yin, S. Wang, L. Zhang, Y. Xiong, B. Chen and Q. Sun, *Adv. Funct. Mater.*, 2024, **34**, 2409356.

- 86 H. Ling, Q. Wang, Z. Yan, X. Li, K. Zou, Y. He, K. Li, Y. Cui, T. Liu, W. Chen, H. Du, Y. Liu, W. Xin, X.-Y. Kong, L. Jiang and L. Wen, *Angew. Chem. Int. Ed.*, 2025, **64**, e202423073.
- 87 X. Yu, C. Li, J. Chang, Y. Wang, W. Xia, J. Suo, X. Guan, V. Valtchev, Y. Yan, S. Qiu and Q. Fang, *Angew. Chem. Int. Ed.*, 2022, **61**, e202200820.
- 88 C. Wang, J. Tang, L. Li, J. Wan, Y. Ma, Y. Jin, J. Liu, H. Wang and Q. Zhang, *Adv. Funct. Mater.*, 2022, **32**, 2204068.
- 89 R. Li, J. Zhai, J. Jiang, Q. Wang and S. Wang, *ACS Appl. Energy Mater.*, 2022, **5**, 7176–7184.
- 90 C. Zhang, T. Xiao, J. He, B. Lu, X. Li, J. Zhai and X. Fan, *Small*, 2023, **19**, 2301512.
- 91 S. Yin, J. Li, Z. Lai, Q.-W. Meng, W. Xian, Z. Dai, S. Wang, L. Zhang, Y. Xiong, S. Ma and Q. Sun, *Nat. Commun.*, 2024, **15**, 8137.
- 92 H. Wen, J. Wang, Z. Dai, X. Liu, S. Liang, F. Xu, Z. Hu, Z. Yang, P. Jin, J. Yang, B. van der Bruggen and S. Yuan, *Small*, 2025, **21**, 2410140.
- 93 Q. Guo, Z. Xing, H. Guo, Z. Lai, J. Yi, D. Wu, Z. Dai, L. Zhang, S. Wang, S. Ma and Q. Sun, *Adv. Mater.*, 2025, **37**, 2420636.
- 94 M. Chen, K. Yang, J. Wang, H. Sun, X.-H. Xia and C. Wang, *Adv. Funct. Mater.*, 2023, **33**, 2302427.
- 95 M. Gao, M.-J. Zheng, A. F. M. EL-Mahdy, C.-W. Chang, Y.-C. Su, W.-H. Hung, S.-W. Kuo and L.-H. Yeh, *Nano Energy*, 2023, **105**, 108007.
